# Supplementary material for: Advances in the Synthesis of Graphene: A Comprehensive Review
Source: Preprints.org preprint supplement (doi:10.20944/preprints202405.0582.v1), 2024-05-09
Supplement: Supplementary file 1 [file supplementary]

**Advances in the Synthesis of Graphene: A Comprehensive Review**

**Ajeet Kumar Gupta1, Dr. Gopal Krishna Gupta2***

**1 Dept. of Physics, Late Chandrashekhar ji Purva-Pradhanmantri Smarak Mahavidhyalaya Sevarayi, Ghazipur**

**2Depatment of Physics, Jannayak Chandrashekhar University, Ballia**

- **Corresponding author–** [**Gopal.krishna.gupta.786@gmail.com**](mailto:Gopal.krishna.gupta.786@gmail.com)

| **Synthesis Method** | **Principle of Operation** | **Advantages** | **Challenges and Future Directions** |
| --- | --- | --- | --- |
| Chemical Vapor Deposition (CVD) | Catalytic decomposition of hydrocarbon precursors on a metal catalyst substrate at elevated temperatures | - Scalability - Control over thickness and morphology - Compatibility with substrates - High quality and uniformity - Tunable doping and functionalization | - Catalyst contamination and substrate effects - Uniformity and defect engineering - Scalability and cost-effectiveness - Heterostructure integration - Environmental and safety considerations |
| Mechanical Exfoliation | Mechanical cleavage of graphite crystals to isolate individual graphene layers | - Pristine quality - Thickness control - Low cost and accessibility - Rapid prototyping - Compatibility with substrates | - Low yield and efficiency - Lack of uniformity - Sample contamination - Limited scalability - Lack of control over lateral dimensions |
| Epitaxial Growth | Growth of graphene layers on single-crystal metal substrates with precise control over crystal structure | - Precise control over crystal structure - Large-area growth - High quality and uniformity - Precise control over doping - Compatibility with heterostructures | - Substrate compatibility and surface quality - Interfacial interactions and strain engineering - Scalability and cost-effectiveness - Defect engineering and surface functionalization - Integration with device fabrication |
| Chemical Reduction | Reduction of graphene oxide using reducing agents to remove oxygen functional groups | - Enhanced electrical conductivity - Mechanical strength and flexibility - Chemical stability and compatibility - Tunable properties - Scalability and cost-effectiveness | - Residual functional groups and defects - Environmental and safety concerns - Control over structural and morphological properties - Stability and long-term performance - Integration with other materials and processes |
